# Supplementary material for: In Vitro Transfection of Up-Regulated Genes Identified in Favorable-Outcome Neuroblastoma into Cell Lines
Source: MDPI journal article supplement (doi:10.3390/cells11193171), 2022-10-10
Supplement: s1 [file s1]

Supple. Table S1. Origins and characteristics of neuroblastoma cell lines.

| Cell Line  | Age/sex   | INRG Stage | Origin        | MYCN Status    | p53 status | DHRS3 status | CYP26A1 status | NR0B1 status | Rethinol Sensitive | Cosmic ID  |
|------------|-----------|------------|---------------|----------------|------------|--------------|----------------|--------------|--------------------|------------|
| TGW        | 1y3m/Male | Unk        | adrenal grand | Amplified      | Mutation   | Functional   | Functional     | Functional   | +                  | COSS910780 |
| SK-N-SH    | 4y/Female | M          | thorax        | Single         | Functional | Functional   | Functional     | Functional   | +                  | COSS717431 |
| NH-12      | 1y3m/Male | M          | adrenal grand | Amplified      | Functional | Functional   | Functional     | Functional   | +                  | COSS908447 |
| NH-6       | 9m/Female | M          | adrenal grand | Amplified      | Functional | Functional   | Functional     | Functional   | +                  | No         |
| GOTO       | 1y1m/Male | M          | adrenal grand | Amplified      | Functional | Functional   | Functional     | Functional   | Unknown            | COSS906875 |
| IMR-32     | 1y1m/Male | Unk        | Abdomen       | Amplified / DM | Functional | Unknown      | Unknown        | Unknown      | +                  | No         |
| SK-N-BE(2) | 2y2m/Male | M          | Unknown       | Amplified      | Mutation   | Unknown      | Unknown        | Unknown      | +                  | No         |

INRG: International neuroblastoma risk group, DM: double minutes

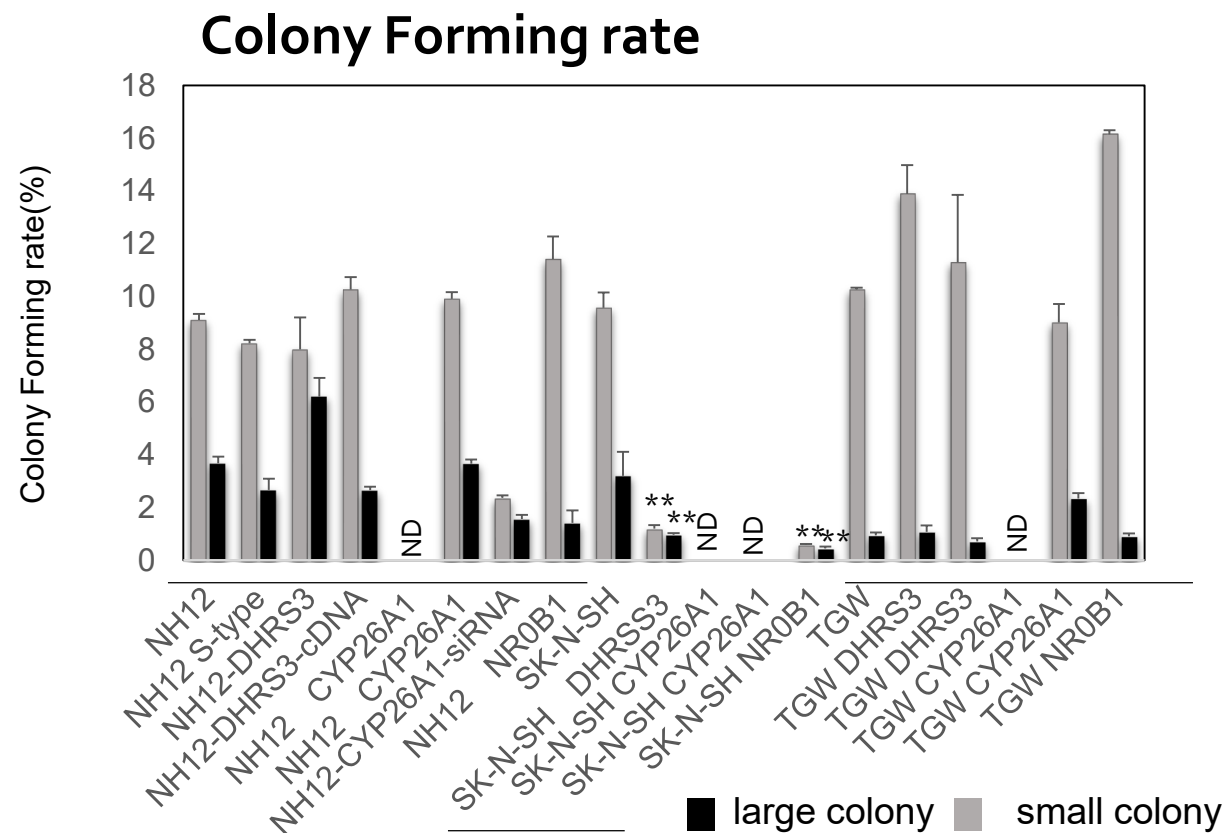

Supple. Figure S1. The colony rates in DHRS3-, CYP26A1-, and NROB1-overexpressing clones in soft-agar colony-formation assay.

## Supple Table S2. Up- or Down- regulated pathway in DHRS3 expressing SK-N-SH cells.

### a) Details of top 10 up-regulated pathways in DHRS3 expressing SK-N-SH

| Pathways ( 10 of 10 )                                          | p-value     | Matched Entities | Pathway Entities Gene                              |
|----------------------------------------------------------------|-------------|------------------|----------------------------------------------------|
| 1Hs_Vitamin_A_and_Carotenoid_Metabolism_WP716_83589            | 2.75E-04    | 2                | 43 Npc1l1, DHRS3                                   |
| 2Hs_GPCR_ligand_binding_WP1825_83346                           | 0.00175654  | 3                | 438 TAC3/TAC3, PRLHR/PRLHR                         |
| 3Hs_LGI-ADAM_interactions_WP3392_83198                         | 0.006803198 | 1                | 12 LGI4                                            |
| 4Hs_WNT_ligand_biogenesis_and_trafficking_WP2790_83226         | 0.014684311 | 1                | 26 WNT4 /N4GlycoAsn-WNT4 /N4GlycoAsn-PalmS<br>WNT4 |
| 5Hs_Signaling_by_Retinoic_Acid_WP3323_83286                    | 0.023618052 | 1                | 42 DHRS3                                           |
| 6Hs_Apoptotic_execution_phase_WP1784_83236                     | 0.028055815 | 1                | 52 HIST1H1E                                        |
| 7Hs_Arachidonic_acid_metabolism_WP2650_83044                   | 0.029714996 | 1                | 53 FAAH2                                           |
| 8Hs_DNA_Damage-Telomere_Stress_Induced_Senescence_WP3565_83455 | 0.03412625  | 1                | 61 HIST1H1E                                        |
| 9Hs_Folate_Metabolism_WP176_82704                              | 0.03687353  | 1                | 67 FOLR2                                           |
| 10Hs_Visual_phototransduction_WP2776_83212                     | 0.045614697 | 1                | 85 DHRS3                                           |

### b) Details of top 10 down-regulated pathways in DHRS3 expressing SK-N-SH ↓.

| Pathways (10 of 46)                                               | p-value  | Matched Entities | Pathway Entities Gene                                                                           |
|-------------------------------------------------------------------|----------|------------------|-------------------------------------------------------------------------------------------------|
| 1Hs_Oncostatin_M_Signaling_Pathway_WP2374_73668                   | 2.36E-05 | 5                | 65 PRKCB, OSMR, CYR61, CCL2, SERPINE1                                                           |
| 2Hs_Gastrin-CREB_signalling_pathway_via_PKC_and_MAPK_WP2664_83266 | 3.88E-06 | 8                | 180 PDKRB1,PDKRB2,HRH1,CYSLTR2, EDN1,<br>EDN2,F2RL2,HBEGF                                       |
| 3Hs_GPCR_ligand_binding_WP1825_83346                              | 1.68E-05 | 11               | 438 BDKRB1,BDKRB2,CCL2, EDN1, EDN2, F2RL2(22-<br>374), HRH1/HRH1, PTGER2, PTHLH,<br>GPR39/GPR39 |
| 4Hs_miRNA_targets_in_ECM_and_membrane_receptors_WP2911_83020      | 2.62E-05 | 4                | 45                                                                                              |
| 5Hs_ACE_Inhibitor_Pathway_WP554_84372                             | 9.02E-05 | 3                | 17                                                                                              |
| 6Hs_Circadian_rythm_related_genes_WP3594_84573                    | 9.58E-05 | 7                | 210                                                                                             |
| 7Hs_TGF-beta_Receptor_Signaling_WP560_83868                       | 1.99E-04 | 4                | 55 THBS1, SPP1, SERPINE1, LIF                                                                   |
| 8Hs_Integrin_cell_surface_interactions_WP1833_83181               | 3.58E-04 | 4                | 66 THBS1, SPP1/SPP1, CD44/CD44, VCAM1/VCAM1                                                     |
| 9Hs_GPCRs,_Class_A_Rhodopsin-like_WP455_81793                     | 4.70E-04 | 7                | 262 HRH1, BDKRB2, BDKRB1, F2RL2, PTGER2,<br>CYSLTR2, GPR39                                      |
| 10Hs_Focal_Adhesion_WP306_80308                                   | 5.11E-04 | 6                | 191 PDGFB, COL3A1, COL5A1, SPP1, THBS1, THBS2                                                   |

Supple. Figure S2

a)

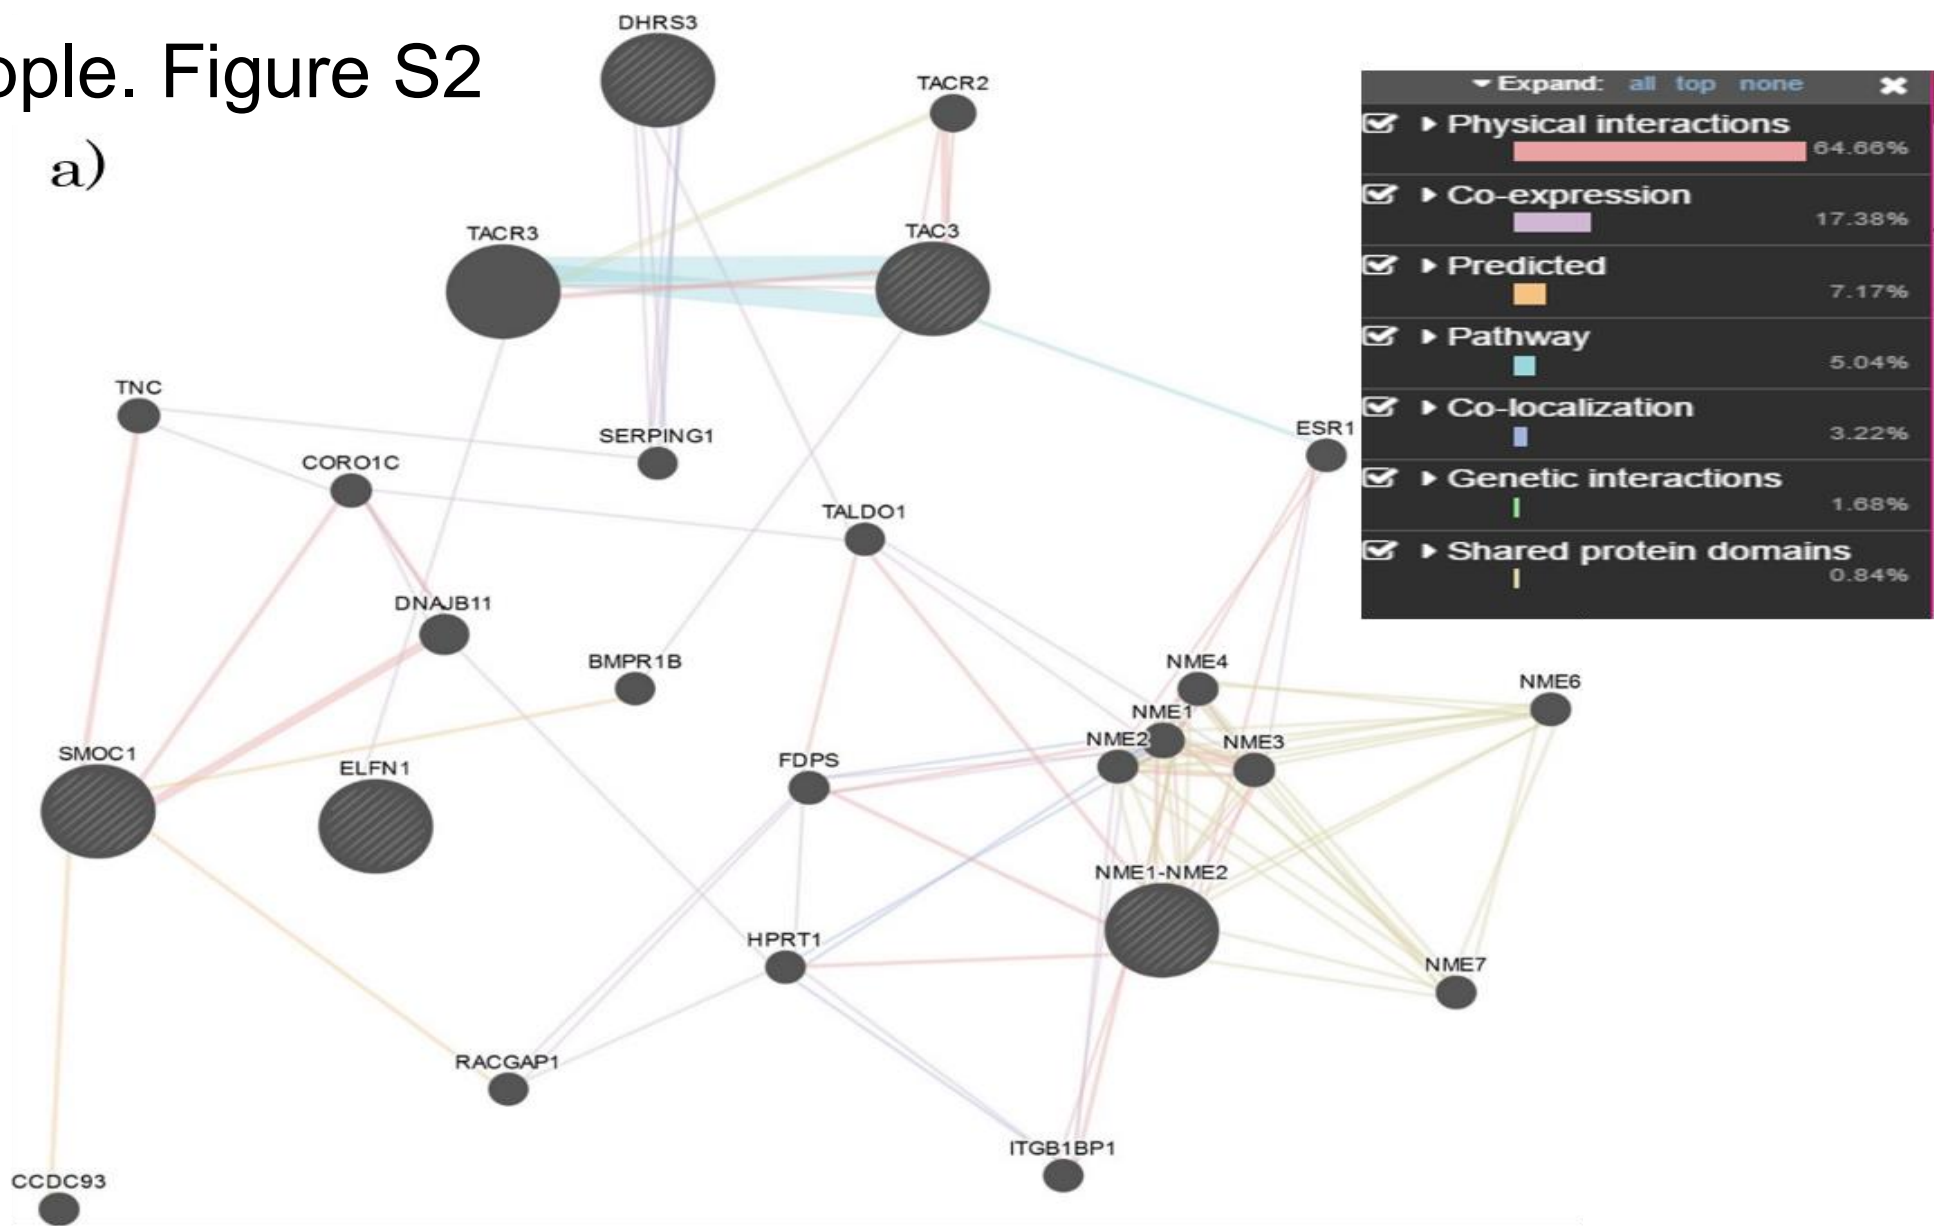

Gene and protein network of top 5 Up-regulated genes. Top 5 Up-regulated genes (*ELFN1*, *NME1-NME2*, *SOMC1*, *TAC3*, *DHR3*) expressed in DHR3-SK-N-SH cells, were analyzed by GENEMANIA online analysis tool. DHR3 was not directly regulates other genes.

b)

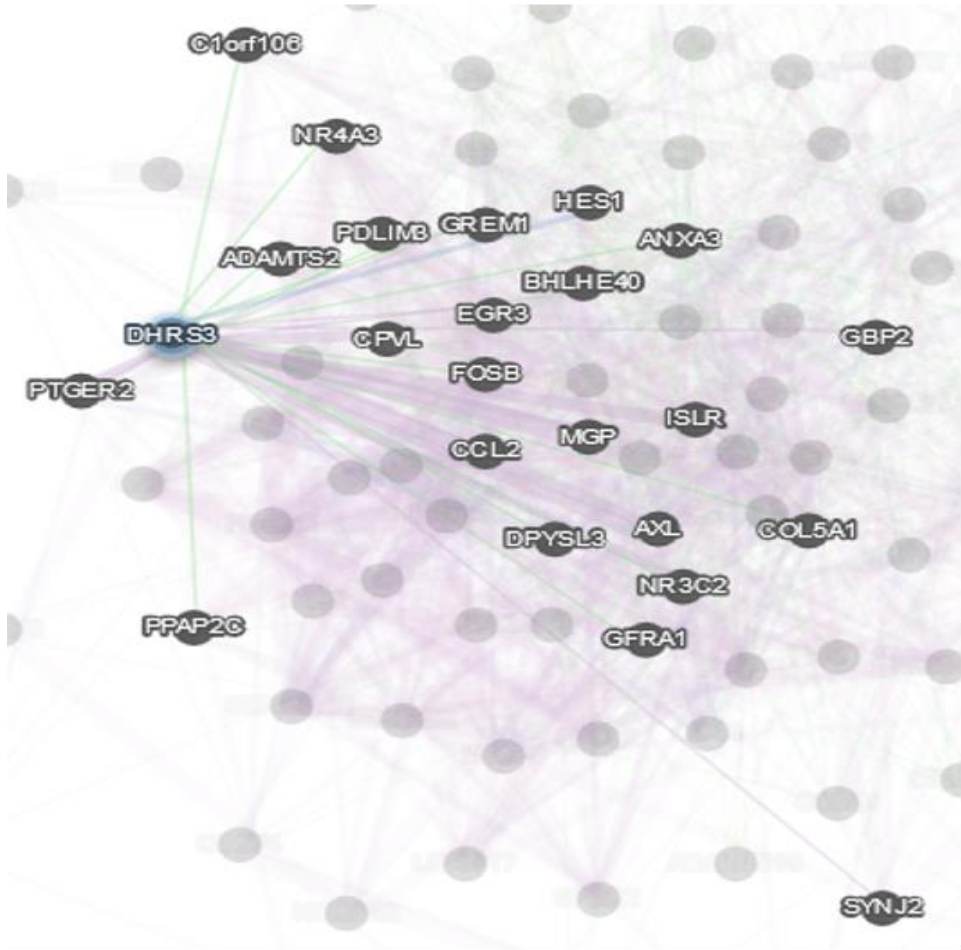

GENEMANIA network of directly interaction with DHR3 of Up and Down-regulated genes (filtered by fold 10 alternation). Up-regulated 5 genes and down109 genes were analyzed. Analysis were performed by GENEMANIA.

c) Top 29 of transcription factors Down-regulated in the SK-N-SH overexpress DHR3 cells analyzed by Tfacts(P<0.05).

| Transcript ion Factor | P.value  | E.value  | Q.value  | FDR control (B-H) | Inters Target | Target genes |
|-----------------------|----------|----------|----------|-------------------|---------------|--------------|
| JUN                   | 0.00E+00 | 0.00E+00 | 0.00E+00 | 9.09E-04          | 8             | 131          |
| SMAD3                 | 1.00E-05 | 5.50E-04 | 5.66E-05 | 1.82E-03          | 5             | 63           |
| EGR1                  | 4.00E-05 | 2.20E-03 | 1.51E-04 | 2.73E-03          | 5             | 91           |
| SMAD2                 | 1.00E-04 | 5.50E-03 | 2.83E-04 | 3.64E-03          | 3             | 21           |
| GLI1                  | 1.80E-04 | 9.90E-03 | 4.08E-04 | 4.55E-03          | 5             | 124          |
| CTNNB1                | 2.80E-04 | 1.54E-02 | 5.29E-04 | 5.46E-03          | 7             | 306          |
| SMAD4                 | 9.60E-04 | 5.28E-02 | 1.55E-03 | 6.36E-03          | 3             | 45           |
| TBP                   | 1.31E-03 | 7.21E-02 | 1.86E-03 | 7.27E-03          | 3             | 50           |
| STAT1                 | 2.32E-03 | 1.28E-01 | 2.63E-03 | 8.18E-03          | 3             | 61           |
| TCF7L2                | 2.32E-03 | 1.28E-01 | 2.63E-03 | 9.09E-03          | 3             | 61           |
| NFKB1                 | 3.15E-03 | 1.73E-01 | 3.24E-03 | 1.00E-02          | 4             | 141          |
| WT1                   | 6.13E-03 | 3.37E-01 | 5.79E-03 | 1.09E-02          | 2             | 27           |
| ETS2                  | 7.53E-03 | 4.14E-01 | 6.56E-03 | 1.18E-02          | 2             | 30           |
| OLIG1                 | 8.78E-03 | 4.83E-01 | 6.63E-03 | 1.27E-02          | 1             | 2            |
| SMAD6                 | 8.78E-03 | 4.83E-01 | 6.63E-03 | 1.36E-02          | 1             | 2            |
| SP1                   | 9.63E-03 | 5.30E-01 | 6.82E-03 | 1.46E-02          | 6             | 428          |
| USF1                  | 1.15E-02 | 6.31E-01 | 7.65E-03 | 1.55E-02          | 3             | 108          |
| NOTCH1                | 1.31E-02 | 7.23E-01 | 8.22E-03 | 1.64E-02          | 2             | 40           |
| PPARG                 | 1.38E-02 | 7.58E-01 | 8.22E-03 | 1.73E-02          | 2             | 41           |
| NFIC                  | 1.65E-02 | 9.05E-01 | 8.61E-03 | 1.82E-02          | 2             | 45           |
| NOTCH4                | 1.75E-02 | 9.61E-01 | 8.61E-03 | 1.91E-02          | 1             | 4            |
| FOSL1                 | 1.75E-02 | 9.61E-01 | 8.61E-03 | 2.00E-02          | 1             | 4            |
| ID1                   | 1.75E-02 | 9.61E-01 | 8.61E-03 | 2.09E-02          | 1             | 4            |
| SP3                   | 1.96E-02 | 1.08E+00 | 9.26E-03 | 2.18E-02          | 3             | 132          |
| EPAS1                 | 2.18E-02 | 1.20E+00 | 9.88E-03 | 2.27E-02          | 1             | 5            |
| ESR1                  | 2.32E-02 | 1.28E+00 | 1.01E-02 | 2.36E-02          | 2             | 54           |
| SP4                   | 3.04E-02 | 1.67E+00 | 1.28E-02 | 2.46E-02          | 1             | 7            |
| CDX2                  | 3.89E-02 | 2.14E+00 | 1.57E-02 | 2.55E-02          | 1             | 9            |
| BCL6                  | 4.31E-02 | 2.37E+00 | 1.69E-02 | 2.64E-02          | 1             | 10           |



**DHRS3**

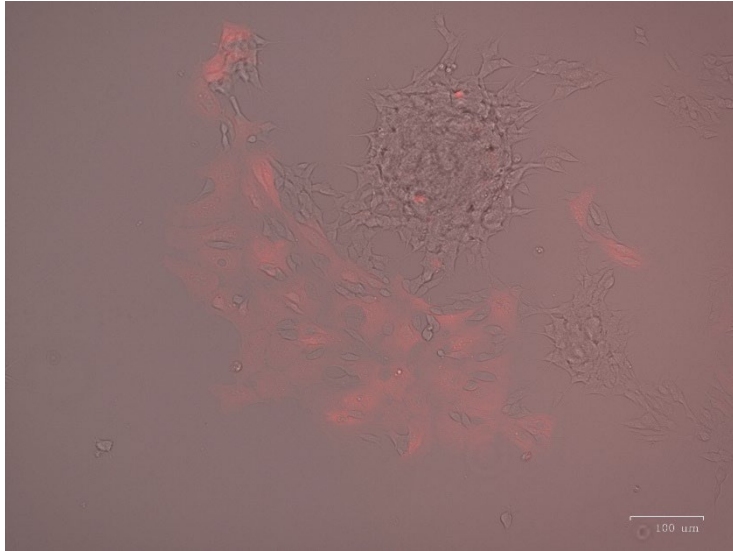

**CYP26A1**

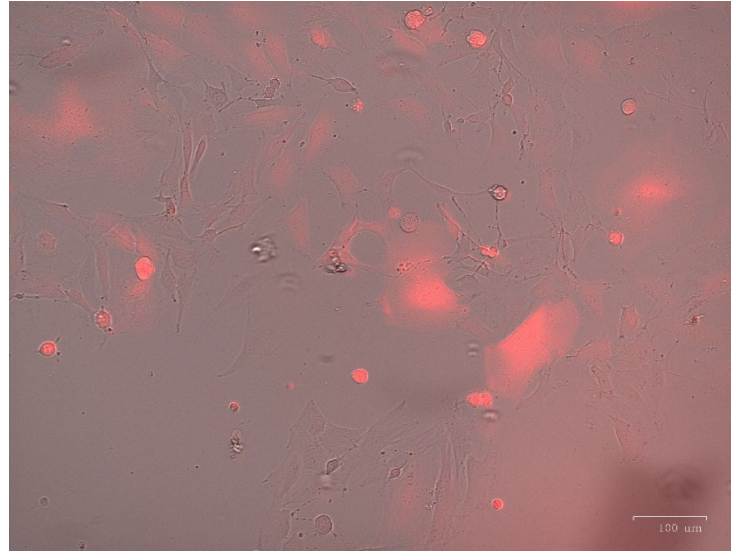

**NROB1**

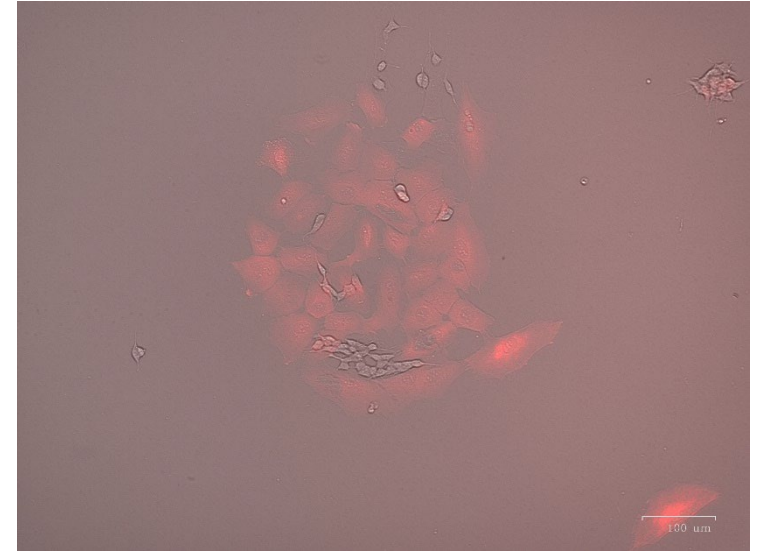

**SK-N-SH Dox 5 days**

Supple. Figure S 3 . Phenotypic alterations of SK-N-SH cells after Dox treatment for 5 days.

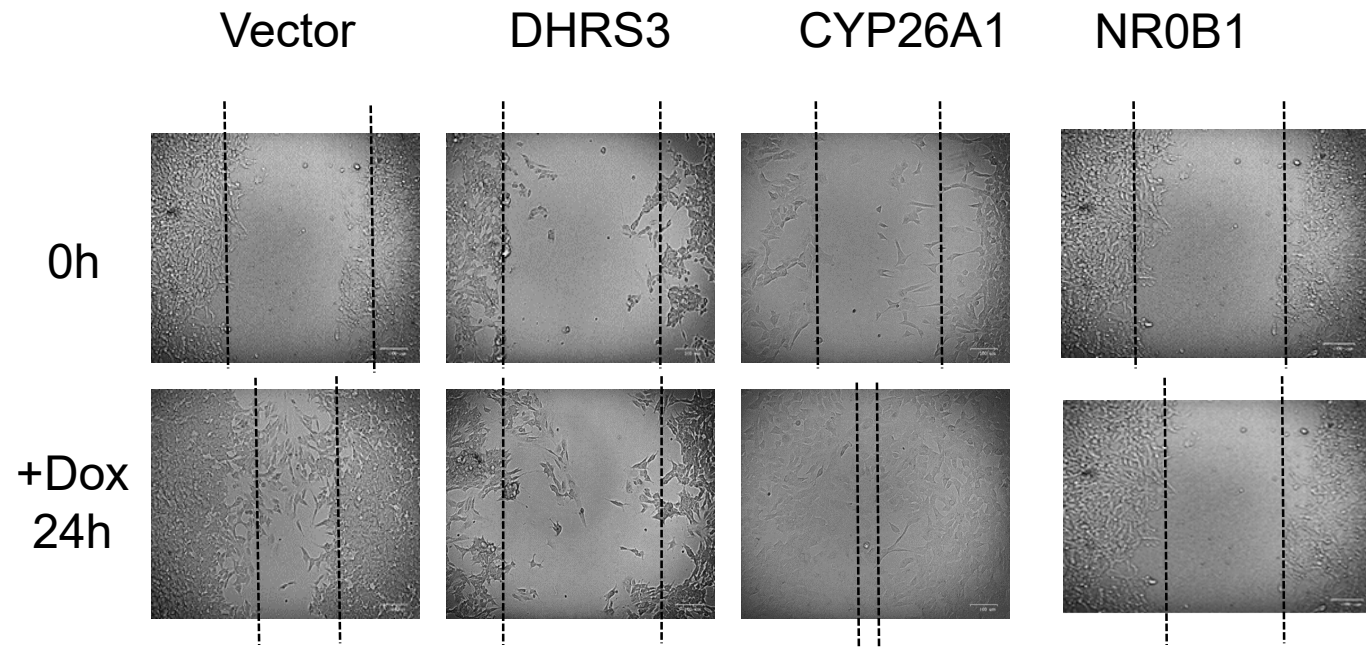

Supple. Figure S 4 . Wound healing migration assay of SK-N-SH cells.

Supple. Table S3. Cell sizes of transfected SK-N-SH cells in the flow-cytometry.

| Gene            | DHRS3 |        | CYP26A1 |        | NROB1 |        |
|-----------------|-------|--------|---------|--------|-------|--------|
| Induction       | Dox-  | Dox+   | Dox-    | Dox+   | Dox-  | Dox+   |
| FSC-A<br>Median | 87.38 | 190.18 | 103.12  | 173.13 | 71.16 | 197.43 |
| SSC-A<br>Median | 44.33 | 128.71 | 106.04  | 111.44 | 42.33 | 125.11 |
